# Supplementary material for: Combining Portable Raman Probes with Nanotubes for Theranostic Applications
Source: PubMed Central journal article supplement — Theranostics. 2011 Jul 4;1:310–21. doi: 10.7150/thno/v01p0310 (PMC3137983; doi:10.7150/thno/v01p0310), 2011-07-04
Supplement: thnov01p0310s1.pdf [file thnov01p0310s1.pdf]

Supplementary Materials for “Combining Portable Raman Probes with Nanotubes for Theranostic Applications”, Ashwinkumar A. Bhirde, et al.

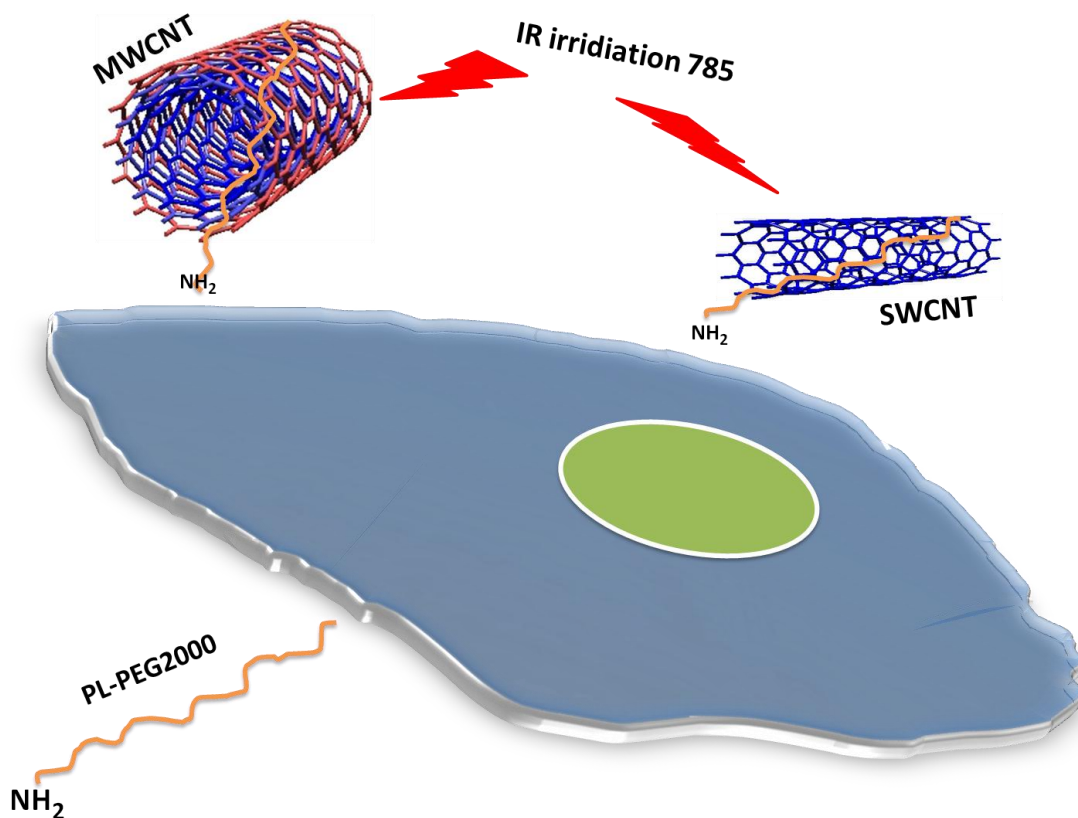

**Figure S1** Schematic showing cancer cell being treated with SWCNTs and MWCNTs dispersed in phospholipid PEG (PL-PEG-NH<sub>2</sub>) and later irradiated.

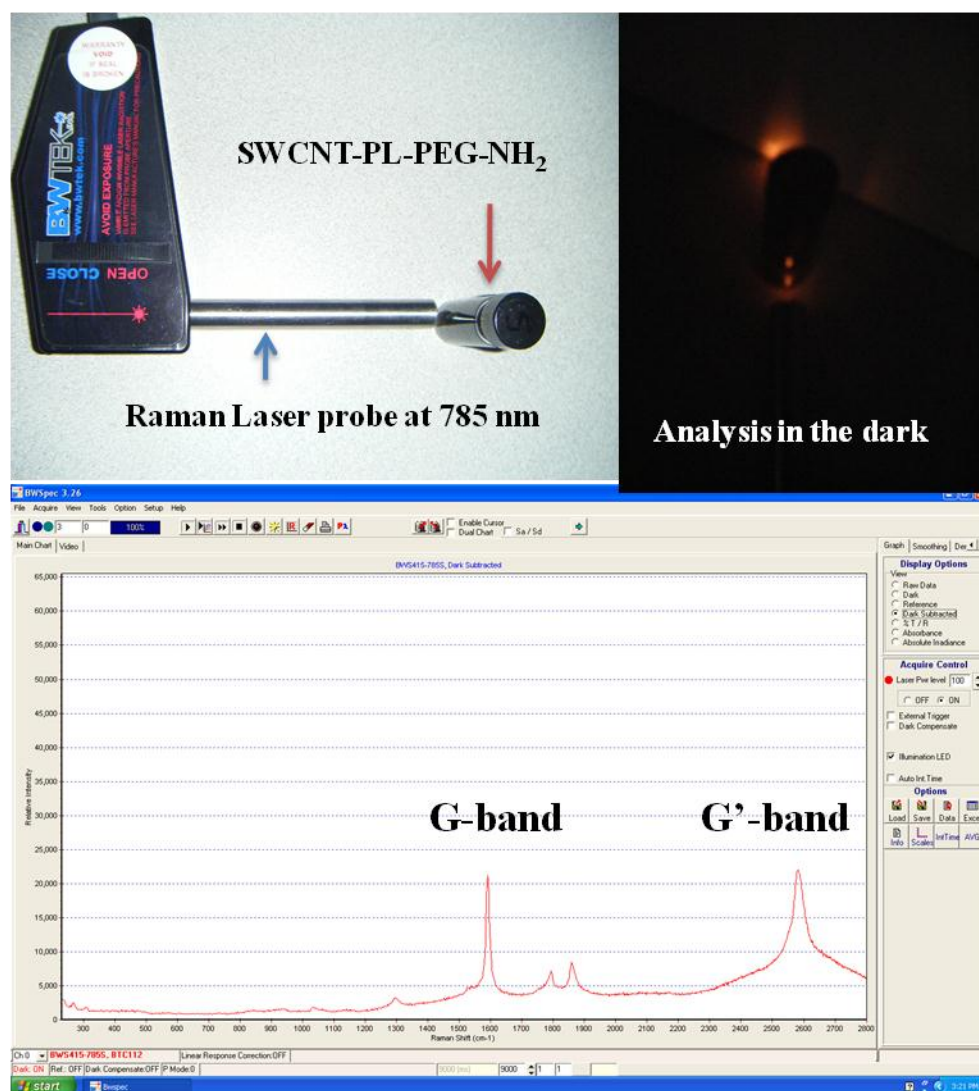

**Figure S2** A handheld Raman probe directly analyzing the aqueous nanotube dispersion showing a clear spectrum.

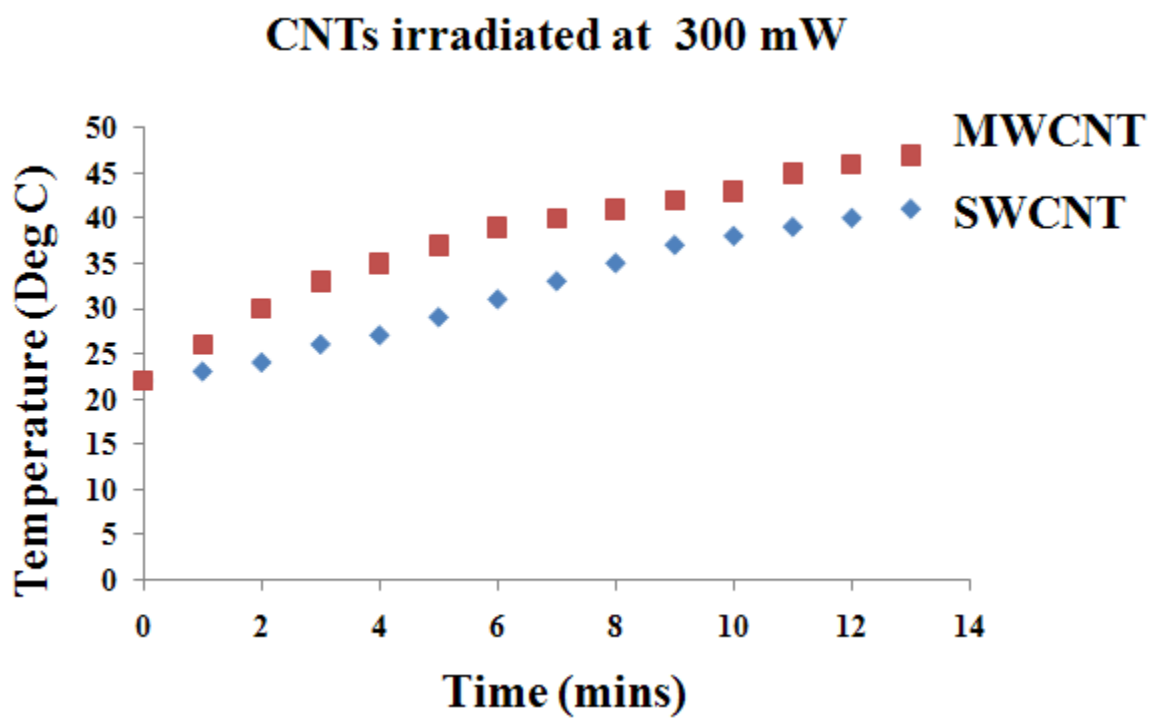

**Figure S3.** Temperature profile of LP coated SWCNTs and MWCNTs Aqueous dispersed SWCNTs and MWCNTs were irradiated using a handheld portable iRaman with a 785 nm laser probe at 300 mW.

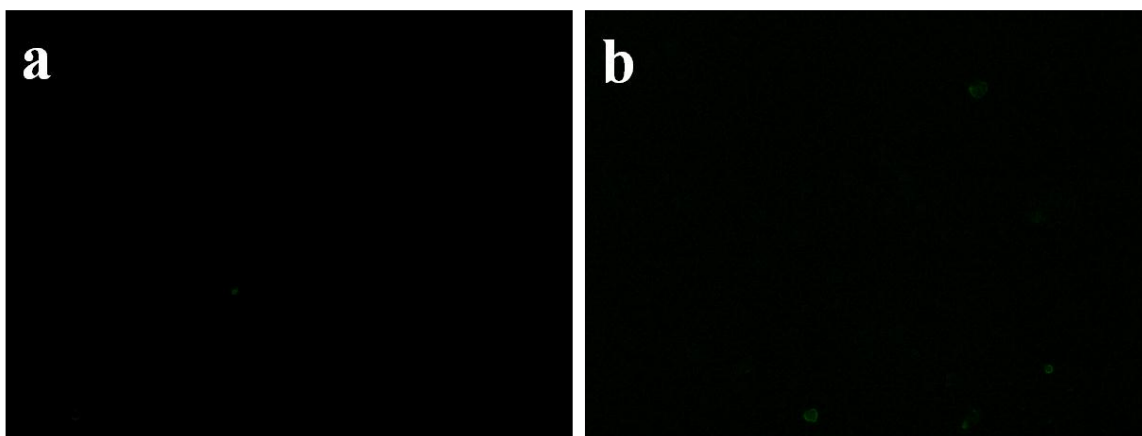

**Figure S4. TUNEL staining of SWCNT-PL-PEG-NH<sub>2</sub> and MWCNT-PL-PEG-NH<sub>2</sub> in 2D cell culture *in vitro*.** OVCAR8 ovarian cancer cells treated with LP dispersed SWCNTs and MWCNTs for 3 hrs. TUNEL staining was done on non-irradiated cells in the presence of CNTs to detect apoptosis. (**a**, **b**) Cells did not show any green fluorescence indicating the aqueous dispersed CNTs did not prompt apoptosis in the absence of laser.
